22 **Abstract**

23 Cytochrome P450 enzymes play major roles in insect detoxification of plant toxins and insecticides.  
24 However, measuring P450 activity in aphids has variable success, and a reliable method is not available  
25 yet. In this study, we evaluated and optimized the method for measuring P450 activity in aphids using the  
26 7-ethoxycoumarin as the substrate. First, we found that nicotinamide adenine dinucleotide phosphate and  
27 protective agents are not needed in the aphid P450 activity assay, and homogenizing the green peach  
28 aphid, *Myzus persicae*, in the microplate resulted in significantly higher P450 activities than those in  
29 Eppendorf tube. Homogenizing aphids in Eppendorf tube could grind tissues thoroughly and released  
30 uncharacterized compounds that could inhibit aphid and pig liver P450 activities, whereas aphids in the  
31 microplate likely could not be thoroughly ground and thus released fewer such inhibitors. Then, the  
32 microplate homogenization method was optimized to follows: one or two aphids were put into one well of  
33 the microplate and ground in phosphate buffer using pipette tips for 20 cycles, followed by addition of  
34 7-ethoxycoumarin, and then incubated for 1 h at room temperature, after which glycine buffer-ethanol  
35 mixture was added to stop the reaction. This method is also suitable for the pea aphid, *Acyrtosiphon*  
36 *pisum*, and the bird cherry□oat aphid, *Rhopalosiphum padi*. These results emphasize the importance of  
37 considering inhibitory effect of endogenous compounds in insects on their P450 activity and provide one  
38 possible method to reduce this inhibitory effect.

39

40 *Key words:* *Acyrtosiphon pisum*, cytochrome P450, detoxification enzymes, 7-ethoxycoumarin, *Myzus*  
41 *persicae*, *Rhopalosiphum padi*

42

43 **Introduction**

44 Cytochrome P450 enzymes can be found in almost all living organisms. They play important roles in the  
45 metabolism of endogenous compounds such as steroids, vitamins, hormones, carbohydrates and fatty  
46 acids, and they are also heavily involved in detoxifying exogenous compounds such as drugs, plant toxins,  
47 and mutagen (Liu et al., 2015). The P450 gene expression and activity in insects can be induced by plant  
48 toxins and further may confer insect resistance to insecticides (Liu et al., 2015). For example,  
49 overexpression of P450 gene *CYP6CY3* was essential for the green peach aphid, *Myzus persicae*, in  
50 detoxifying nicotine in tobacco as well as neonicotinoid insecticides (Puinean et al., 2010). The elevated  
51 P450 activity in insects has been used as a biomarker for certain insecticide resistance (Liu et al., 2015).  
52 Therefore, it is important to accurately measure the activities of P450 enzymes in insects.

53       Some previous studies failed to measure P450 activity in aphids as well as in some other small  
54 insects (Philippou et al., 2010; Gottardi et al., 2016), probably because the P450 activity was too low to  
55 detect by traditional method. Another possibility is that some uncharacterized compounds, released during  
56 homogenization, might inhibit the P450 activity (Orrenius et al., 1971; Wilson & Hodgson, 1972; Gilbert  
57 & Wilkinson, 1975; Valles & Yu, 1996). In addition, the P450 activity of mites could only be detected in  
58 supernatant after low-speed centrifugation, suggesting that the general P450 activity assays carried out  
59 with microsomal fraction prepared from high-speed centrifuged tissue homogenate may not be suitable  
60 for all organisms (Pasay et al., 2009). Until now, no universal method for measuring P450 activity in  
61 aphids has been established, although in certain aphid species such measurement has been reported  
62 (Castaneda et al., 2009).

63       Most assays measuring P450 activity are based on the transformation of non- or low-fluorescent

64 P450 substrates to highly fluorescent metabolites catalyzed by P450 enzymes (Desousa et al., 1995;  
65 Gottardi et al., 2016). Among these substrates, 7-ethoxycoumarin (7-EC, 7-Ethoxy-1-benzopyran-2-one)  
66 is the most widely used chemical for measuring P450 dependent 7-ethoxycoumarin-O-dealkylation  
67 (ECOD) activity (Gottardi et al., 2016). This substrate has been widely used for measuring P450 activities  
68 in insects, fish, mammals, and nematodes, although other substrates may also work (Castaneda et al.,  
69 2009; Pasay et al., 2009; Gottardi et al., 2016). Therefore, we chose 7-ethoxycoumarin as the substrate for  
70 measuring aphid P450 activity in this study.

71 The ECOD activity in *M. persicae* was difficult to measure because of endogenous inhibitors  
72 presented in *M. persicae* homogenate, which could even significantly reduce ECOD activity of rabbit  
73 liver homogenate (Philippou et al., 2010). We obtained a much higher ECOD activity by homogenizing *M.*  
74 *persicae* in the 96-well microplate than in the Eppendorf (EP) tube. Furthermore, we found that  
75 homogenizing *M. persicae* in the EP tube inhibited ECOD activity of pig liver, whereas no inhibitory  
76 effect was found when aphids were homogenized in the microplate. Accordingly, we evaluated and  
77 optimized the method measuring ECOD activity in *M. persicae* by homogenizing aphids in the microplate.  
78 The results suggest that homogenizing aphids in the microplate can significantly reduce the release of  
79 inhibitors and is suitable for measuring P450 activity in *M. persicae* as well as some other aphid species.

80

## 81 **Materials and methods**

### 82 **Chemicals**

83 Potassium dihydrogen phosphate ( $\text{KH}_2\text{PO}_4$ , CAS: 7778-77-0, purity:  $\geq 99.5\%$ ), dipotassium hydrogen  
84 phosphate trihydrate ( $\text{K}_2\text{HPO}_4 \cdot 3\text{H}_2\text{O}$ , CAS: 16788-57-1, purity:  $\geq 99.0\%$ ), glycerol (CAS: 56-81-5, purity:

85  $\geq 99.0\%$ ), and ethanol (CAS: 64-17-5, purity:  $\geq 99.0\%$ ) were obtained from Guangzhou Jinhua  
86 Chemical Reagent Co., LTD (China). Phenylmethanesulfonyl fluoride (PMSF, CAS: 329-98-6, purity:  $\geq$   
87 99.0%) was acquired from Beijing Solarbio Life Sciences Co., LTD (China). DL-dithiothreitol (DTT, CAS:  
88 3483-12-3, purity:  $\geq 99.0\%$ ), ethylenediaminetetraacetic acid disodium salt dihydrate (EDTA, CAS:  
89 6381-92-6, purity:  $\geq 99.0\%$ ), and  $\beta$ -nicotinamide adenine dinucleotide phosphate reduced tetra  
90 (cyclohexylammonium) salt (NADPH, CAS: 100929-71-3, purity:  $\geq 98\%$ ) were from Sigma-Aldrich  
91 (China). 7-Ethoxycoumarin (7-EC, CAS: 31005-02-4, purity:  $\geq 99.0\%$ ) were bought from J&K Scientific  
92 Ltd. (China) and 7-hydroxycoumarin (7-OH, CAS: 93-35-6, purity:  $\geq 98\%$ ) were from Shanghai Macklin  
93 Biochemical Co., Ltd. (China).

94

## 95 **Aphids**

96 *Myzus persicae* was reared on cabbage plants (*Brassica oleracea* L. var. *capitata*, var. “Qingan 70”) under  
97 a 14:10 h L/D cycle at  $22 \pm 2^\circ\text{C}$  and 50% relative humidity. The pea aphid, *Acyrtosiphon pisum*, was  
98 reared on broad bean and the bird cherry-oat aphid, *Rhopalosiphum padi*, was reared on wheat under the  
99 same conditions.

100

## 101 **Comparison of homogenization methods**

102 To measure P450 activity, most studies homogenize insect tissues in a mortar or an EP tube with fitted  
103 pestles, which could grind tissues thoroughly. Another method is putting intact insects or their dissected  
104 tissues directly into phosphate buffer in a multi-well microplate and then break up with pipette tips or  
105 proceed with no further homogenization (Desousa et al., 1995; Gottardi et al., 2016). First, we compared

106 these two homogenization methods, i.e. homogenizing aphids in an EP tube with fitted pestles, and in a  
107 96-well microplate with pipette tips. For EP tube homogenization method, adult aphids were placed into a  
108 1.5 mL EP tube and homogenized with a plastic pestle in ice cold 100 mM phosphate buffer (pH 7.5)  
109 containing protectants (1mM EDTA, 1 mM DTT, 1 mM PMSF and 20% glycerol). The homogenate was  
110 used for measuring P450 activity without centrifugation. Then, 2.5 mg equivalent aphid homogenates  
111 were added to each microplate well that contained 100  $\mu$ L 7-EC solution (0.5 mM 7-EC dissolved in 100  
112 mM phosphate buffer pH 7.5 containing protectants). For the microplate homogenization method, 2.5 mg  
113 adult aphids were placed into each well of the microplate and homogenized in 100  $\mu$ L 100 mM phosphate  
114 buffer (pH 7.5) containing protectants using a 200  $\mu$ L pipette tip. Then, 100  $\mu$ L 7-EC solutions (0.5 mM  
115 7-EC dissolved in 100 mM phosphate buffer pH 7.5) were added to each microplate.

116 After the mix of aphid homogenates with 7-EC, the reaction was initiated by the addition of 10  $\mu$ L  
117 2.5 mM NADPH into each well. Before the addition of NADPH, the fluorescence intensity of each well (t  
118 = 0) was measured with the Tecan Infinite M200 Microplate Reader (Tecan Group Ltd, Mannedorf,  
119 Switzerland) using 380 nm excitation and 455 nm emission filters, and was considered as basal  
120 fluorescence. The microplates were then incubated at room temperature ( $22 \pm 1^\circ\text{C}$ ) and the fluorescence  
121 intensity was determined after 1 h. The reaction was stopped by adding 100  $\mu$ L 50% (v/v) glycine buffer  
122 (0.5 M)-ethanol, pH 10.4 and fluorescence (t = 1 h). Relative fluorescence units (RFU) was calculated as  
123  $\text{RFU} = \text{fluorescence (t = 1 h)} - \text{fluorescence (t = 0)}$ . Three or four replicates were performed for each  
124 treatment for all assays in this study.

125

126 **Optimization of the P450 activity assay conditions**

127 We found that homogenizing *M. persicae* in the microplate resulted in significantly higher RFU; therefore,  
128 the following assays were conducted to optimize the microplate homogenization method. First, we tested  
129 the necessity of NADPH and protectants (i.e. EDTA, DTT, PMSF, and glycerol) in P450 activity  
130 measurement. Three adult *M. persicae* were homogenized in each well of the microplate using pipette tips  
131 in 50  $\mu$ L 100 mM phosphate buffer or with phosphate buffer containing protectants. Then 50  $\mu$ L 7-EC  
132 solutions (1 mM 7-EC dissolved in 100 mM phosphate buffer pH 7.5 with or without protectants) were  
133 added to each well. The reaction was initiated by the addition of 10  $\mu$ L 2.5 mM NADPH or 10  $\mu$ L  
134 phosphate buffer and stopped by adding 100  $\mu$ L 50% (v/v) glycine buffer (0.5 M)-ethanol after 1 h. The  
135 RFU was determined by the microplate reader as described above.

136 Because we found that NADPH and protectants was not indispensable in measuring aphid P450  
137 activity, these chemicals were not used in the following experiments. To optimize the homogenization  
138 method, three adult *M. persicae* were placed in each microplate well and were gently crushed or ground  
139 with pipette tips for different cycles. To optimize the number of aphids used in each well, 1, 2, 3, or 5  
140 adult *M. persicae* were homogenized in the microplate and their P450 activities were determined as  
141 described above. Time dependence of *M. persicae* P450 activities were determined similarly by using two  
142 adult aphids in each microplate well.

143

#### 144 **Inhibitory effect of *M. persicae* homogenate**

145 Two mg aphid equivalents homogenized in the EP tube without centrifugation were mixed with liver  
146 extracts to examine whether the lower P450 activity of aphids homogenized in the EP tube was due to  
147 inhibitors released during homogenization. Liver extract was prepared by grinding fresh pig liver tissue in

148 100 mM phosphate buffer (pH 7.5) using a glass mortar and pestle. The liver homogenate was then  
149 centrifuged at 4°C 13,000 g for 15 min and the supernatant was collected and used. To test the heat  
150 stability of the endogenous inhibitors, aphid homogenate was heated in boiling water for 5 min and then  
151 mixed with liver extract. The RFU was determined and calculated following previous procedure using  
152 7-EC (dissolved in 100 mM phosphate buffer pH 7.5) as substrate.

153 We also tested the inhibitory effect of the supernatants of aphid homogenate and whether  
154 homogenizing aphids in the microplate had such inhibitory effect on liver extract. After being  
155 homogenized in the EP tube, aphid homogenate was centrifuged at 4°C 13,000 g for 15 min and the  
156 supernatant was collected and used. For microplate homogenization method, aphids were ground in the  
157 microplate using pipette tips for 20 cycles and then mixed with liver extract. The RFU was determined  
158 and calculated as described above.

159

#### 160 **Suitability of the microplate homogenization method for *A. pisum* and *R. padi***

161 To test the suitability and necessity of the microplate homogenization method for measuring P450  
162 activities in *A. pisum* and *R. padi*, ECOD activities in these aphids were determined and compared using  
163 different homogenization methods. The inhibitory effects of both aphid homogenates on the P450 activity  
164 of liver extract were also examined.

165

#### 166 **Fluorescence of chemicals involved in the P450 activity assay**

167 One hundred µL 7-EC, 7-OH, or NADPH, dissolved in 100 mM phosphate buffer pH 7.5 with different  
168 concentrations, were put into the microplate and the fluorescence was determined with the microplate



169 reader. The phosphate buffer was used as the blank control. The fluorescence of these chemicals was also  
170 measured using similar methods after the addition of 100  $\mu$ L 50% (v/v) glycine buffer (0.5 M)-ethanol,  
171 pH 10.4.

172

### 173 **Statistical analysis**

174 The RFU of *M. persicae*, *A. pisum*, and *R. padi* homogenized with different methods were analyzed using  
175 Student's t-test. The influence of NADPH and protectants, grinding degree, number of aphids used in  
176 each microplate well, and inhibitory effects of aphid homogenate on ECOD activities were analyzed  
177 using one-way analysis of variance (ANOVA), followed by Fisher's least significant difference (LSD)  
178 tests, at a significance level of  $P < 0.05$ . All statistical analyses were performed using the IBM SPSS  
179 Statistics package 19 (SPSS Inc., Chicago, IL, USA).

180

## 181 **Results and discussion**

### 182 **Comparison of homogenization methods**

183 The ECOD activity in *M. persicae* was about three times higher when homogenized aphids in the  
184 microplate than in the EP tube (Figure 1;  $df = 4$ ;  $t = 8.28$ ;  $P = 0.001$ ), which agrees with a previous study  
185 that failed to detect ECOD activities in *M. persicae* because of endogenous inhibitors released during  
186 homogenization (Philippou et al., 2010). In addition, we found that homogenized *M. persicae* in the EP  
187 tube (without centrifugation) reduced liver ECOD activities by 90% (Figure 2A;  $df = 2, 9$ ;  $F = 427.806$ ;  $P$   
188  $< 0.001$ ), and this effect still existed after heating aphid homogenate in boiling water (Figure 2A) or after  
189 centrifugation (Figure 2B). According to previous studies, the inhibitory compounds in *M. persicae* could

190 be eye pigment and/or uncharacterized nucleoprotein (Wilson & Hodgson, 1972; Gilbert & Wilkinson,  
191 1975). However, aphids homogenized in the 96-well microplate showed higher ECOD activities (Figures  
192 1), and did not inhibit liver ECOD activities (Figure 2B). Homogenizing aphids in the microplate may not  
193 completely grind aphid tissues and thus likely release little or no endogenous inhibitors. These findings  
194 suggest the importance of considering endogenous inhibitors before measuring cytochrome P450 activity  
195 in aphids.

196

### 197 **Optimization of the ECOD activity assay protocol**

198 Since aphid ECOD activities were not enhanced after the addition of the protectants and NADPH,  
199 these chemicals are not indispensable in measuring aphid ECOD activity (Figure 3A;  $df = 2, 6$ ;  $F = 3.945$ ;  
200  $P = 0.081$ ). Aphid tissues homogenized in the microplate possibly generated enough NADPH for the P450  
201 activity assay and thus NADPH was not needed (Desousa et al., 1995; Castaneda et al., 2009). Moreover,  
202 the fluorescence of residue NADPH may affect the accuracy of the P450 activity assay and needs further  
203 processes to eliminate this influence (Chauret et al., 1999).

204 Grinding *M. persicae* for 20 cycles in the microplate resulted in relatively higher ECOD activities,  
205 whereas higher grinding cycles or crush alone did not lead to higher ECOD activities (Figure 3B;  $df = 3$ ,  
206  $8$ ;  $F = 2.943$ ;  $P = 0.099$ ). Homogenizing aphids by crushing alone may limit the contact of aphid P450  
207 enzyme with 7-EC, while more grinding cycles may release more inhibitors, both of which lead to lower  
208 ECOD activities. Similarly, three or five aphids in one microplate well did not generate higher ECOD  
209 activities than two aphids (Figure 3C;  $df = 3, 15$ ;  $F = 5.949$ ;  $P = 0.007$ ), which may be due to that more  
210 aphids in one microplate well lead to higher concentration of inhibitors. Although the RFU of this assay

211 remained linear for 3 h (Figure 3D;  $R^2 = 0.95$ ), the ECOD activities of different samples could be  
212 differentiated in 1 h because of the high sensitivity. In summary, we improved the method measuring  
213 aphid P450 enzyme activities as follows: one or two aphids were placed in one well of a 96-well  
214 microplate, and ground in phosphate buffer using pipette tips for 20 cycles, followed by addition of 7-EC,  
215 and then incubated for 1 h at room temperature before adding glycine buffer-ethanol mixture to stop the  
216 reaction.

217

#### 218 **Suitability of the microplate homogenization method for *A. pisum* and *R. padi***

219 The pea aphid, *A. pisum* had only approximately one third ECOD activities when homogenized in  
220 the EP tube than in the microplate (Figure 4A;  $df = 6$ ;  $t = 3.208$ ;  $P = 0.018$ ), and this homogenate  
221 significantly reduced liver ECOD activities (Figure 4C), suggesting that *A. pisum* released P450 enzyme  
222 inhibitors during homogenization in the EP tube. However, the bird cherry-oat aphid, *R. padi*, had no such  
223 inhibitory effect on liver ECOD activities (Figure 4C) and showed comparable ECOD activities (Figure  
224 4B;  $df = 6$ ;  $t = 0.079$ ;  $P = 0.939$ ) when homogenized with different methods, implying that there may be  
225 few or no P450 enzyme inhibitors in *R. padi*.

226

#### 227 **Fluorescence of chemicals involved in the P450 activity assay**

228 The P450 enzyme substrate 7-EC had a low fluorescence intensity (Figure 5A; 1.27 a.u./ $\mu\text{M}$ ), and its  
229 fluorescence intensity increased slightly after the addition of glycine buffer-ethanol mixture (Figure 5A;  
230 1.69 a.u./ $\mu\text{M}$ ). However, 7-OH had a relative higher fluorescence levels (Figure 5B; 12,083 a.u./ $\mu\text{M}$ ) and  
231 the fluorescence intensity increased 3.7 times after the addition of glycine buffer-ethanol mixture (Figure

232 5B; 44,645 a.u./ $\mu$ M). These results suggest that 7-EC is suitable as the P450 enzyme substrate, and the  
233 high pH glycine buffer-ethanol buffer can improve the sensitivity of such assay. The NADPH should not  
234 be used in this assay, because NADPH is not needed and had a relative high fluorescence intensity  
235 (Figure 5C; 9.72 a.u./ $\mu$ M).

236

### 237 **Conclusion**

238 Although homogenizing aphids in the 96-well microplate reduced the release of endogenous inhibitors, it  
239 is difficult to guarantee that no inhibitors were released. However, the samples containing two aphids had  
240 about two times higher ECOD activities than one aphid, suggesting that our method can eliminate most, if  
241 not all, inhibitors. Nevertheless, the number of grinding cycles and number of aphids in each microplate  
242 well should be optimized before specific P450 activity assay. This study suggests the necessary of testing  
243 the inhibitory effects of endogenous compounds before measuring P450 activity, and provides one  
244 possible method to reduce this inhibitory effect. We used aphids in the present study, but our method may  
245 be also suitable for other organisms in the P450 activity assay.

246

### 247 **Acknowledgments**

248 Funding of this research was supported by the China Postdoctoral Science Foundation Grant (No.  
249 2017M613229). We are grateful for the assistance of all staff and students in the Key Laboratory of  
250 Applied Entomology, Northwest A&F University at Yangling, Shaanxi, China.

251

### 252 **References**

253 Castaneda LE, Figueroa CC, Fuentes-Contreras E, Niemeyer HM & Nespolo RF (2009) Energetic costs

- 254 of detoxification systems in herbivores feeding on chemically defended host plants: a correlational  
255 study in the grain aphid, *Sitobion avenae*. *Journal of Experimental Biology* 212: 1185-1190.
- 256 Chauret N, Tremblay N, Lackman RL, Gauthier J-Y, Silva JM et al. (1999) Description of a 96-well plate  
257 assay to measure cytochrome P4503a inhibition in human liver microsomes using a selective  
258 fluorescent probe. *Analytical Biochemistry* 276: 215-226.
- 259 Desousa G, Cuany A, Brun A, Amichot M, Rahmani R & Bergé J-B (1995) A microfluorometric method  
260 for measuring ethoxycoumarin-O-deethylase activity on individual *Drosophila melanogaster*  
261 abdomens: interest for screening resistance in insect populations. *Analytical Biochemistry* 229:  
262 86-91.
- 263 Gilbert MD & Wilkinson CF (1975) An inhibitor of microsomal oxidation from gut tissues of the honey  
264 bee (*Apis mellifera*). *Comparative Biochemistry and Physiology Part B: Comparative Biochemistry*  
265 50: 613-619.
- 266 Gottardi M, Kretschmann A & Cedergreen N (2016) Measuring cytochrome P450 activity in aquatic  
267 invertebrates: a critical evaluation of in vitro and in vivo methods. *Ecotoxicology* 25: 419-430.
- 268 Liu N, Li M, Gong Y, Liu F & Li T (2015) Cytochrome P450s-Their expression, regulation, and role in  
269 insecticide resistance. *Pesticide Biochemistry and Physiology* 120: 77-81.
- 270 Orrenius S, Berggren M, Moldéus P & Krieger RI (1971) Mechanism of inhibition of microsomal  
271 mixed-function oxidation by the gut-contents inhibitor of the southern armyworm (*Prodenia*  
272 *eridania*). *Biochemical Journal* 124: 427-430.
- 273 Pasay C, Arlian L, Morgan M, Gunning R, Rossiter L et al. (2009) The effect of insecticide synergists on  
274 the response of scabies mites to pyrethroid acaricides. *PLoS Neglected Tropical Diseases* 3: e354.  
275 doi:10.1371/journal.pntd.0000354.
- 276 Philippou D, Field L & Moores G (2010) Metabolic enzyme(s) confer imidacloprid resistance in a clone  
277 of *Myzus persicae* (Sulzer) (Hemiptera: Aphididae) from Greece. *Pest Management Science* 66:  
278 390-395.
- 279 Puinean AM, Foster SP, Oliphant L, Denholm I, Field LM et al. (2010) Amplification of a cytochrome  
280 P450 gene is associated with resistance to neonicotinoid insecticides in the aphid *Myzus persicae*.  
281 *PloS Genetics* 6. doi:10.1371/journal.pgen.1000999.

282 Valles SM & Yu SJ (1996) German cockroach (Dictyoptera: Blattellidae) gut contents inhibit cytochrome  
283 P450 monooxygenases. *Journal of Economic Entomology* 89: 1508-1512.

284 Wilson TG & Hodgson E (1972) Mechanism of microsomal mixed-function oxidase inhibitor from the  
285 housefly *Musca domestica* L. *Pesticide Biochemistry and Physiology* 2: 64-71.

286

## 287 **Figure legends**

288 **Figure 1** ECOD activities of *M. persicae* homogenized with different methods. Aphids were  
289 homogenized in the EP tube with fitted pestles or ground in 96-well microplate using pipette tips. Data  
290 are mean  $\pm$  SE (n = 3). \*\*P < 0.01 (Student's t-test).

291

292 **Figure 3** Optimization of the P450 enzyme assay conditions. The influence of (A) NADPH and  
293 protectants, (B) grinding degree, (C) number of aphids in each microplate well, and (D) reaction time on  
294 ECOD activities of *M. persicae*. Data are mean  $\pm$  SE (n = 3). Different letters above bars indicate  
295 significant difference at P < 0.05 (one-way ANOVA followed by LSD test).

296

297 **Figure 2** Inhibitory effects of *M. persicae* homogenate on ECOD activity of liver extract. (A) Aphids  
298 homogenized in the EP tube (without centrifugation) reduced liver ECOD activity (Liver + Aphid) and  
299 the inhibitory effects still existed after heating aphid homogenate in boiling water (Liver + Boiled aphid).  
300 (B) Aphids homogenized in the EP tube (after centrifugation) reduced liver ECOD activities (Liver + EP  
301 tube), whereas aphids that were directly homogenized in the microplate had no such inhibitory effect  
302 (Liver + Microplate). Data are mean  $\pm$  SE (n = 4). Different letters above bars indicate significant  
303 difference at P < 0.05 (one-way ANOVA followed by LSD test). The P values above bars was calculated

304 by Student's t-test.

305

306 **Figure 4** ECOD activities of (A) *A. pisum* and (B) *R. padi* homogenized in the EP tube or microplate and  
307 (C) inhibitory effects of aphid homogenate (homogenized in the EP tube) on liver ECOD activity. Data  
308 are mean  $\pm$  SE (n = 4). \*P < 0.05 (Student's t-test) and different letters above bars indicate significant  
309 difference at P < 0.05 (one-way ANOVA followed by LSD test).

310

311 **Figure 5** Fluorescence intensity of (A) 7-EC, (B) 7-OH, and (C) NADPH before and after the addition of  
312 50% (v/v) glycine buffer-ethanol. Data are mean  $\pm$  SE (n = 3).

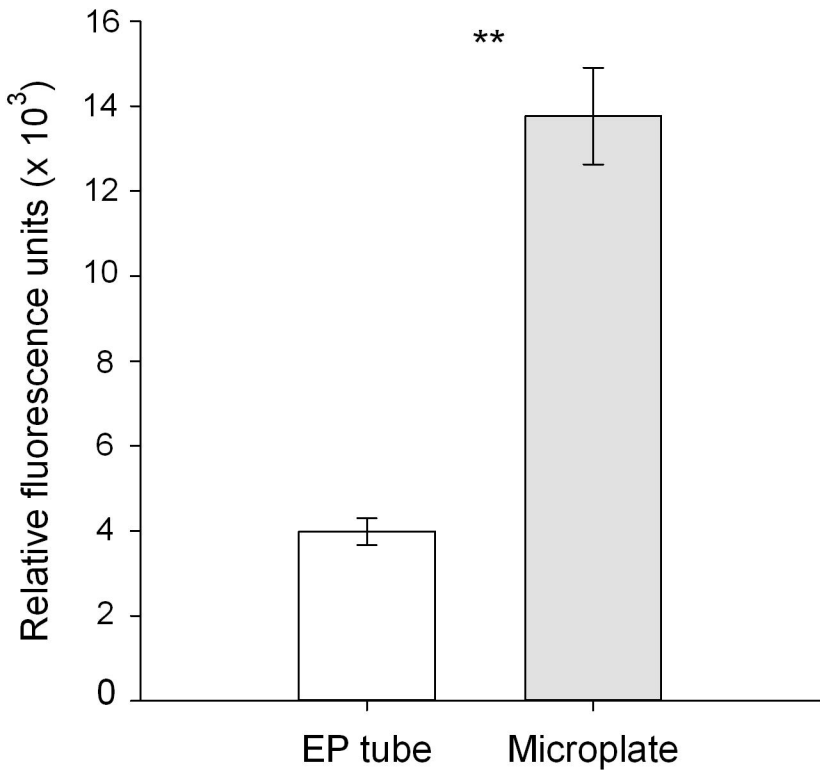



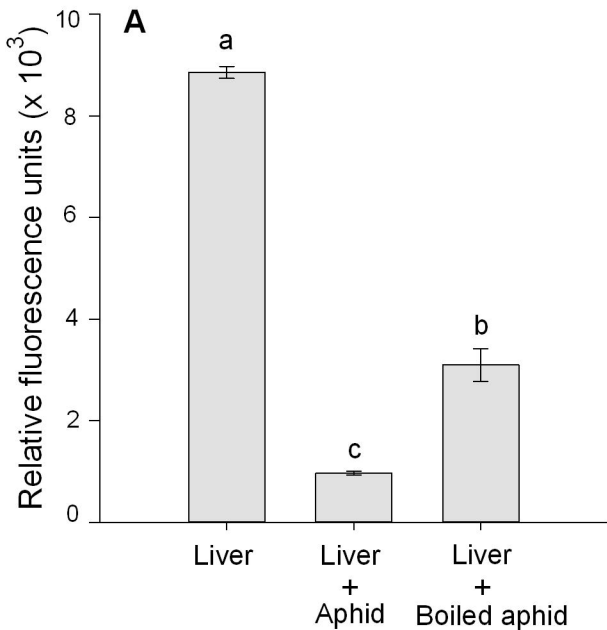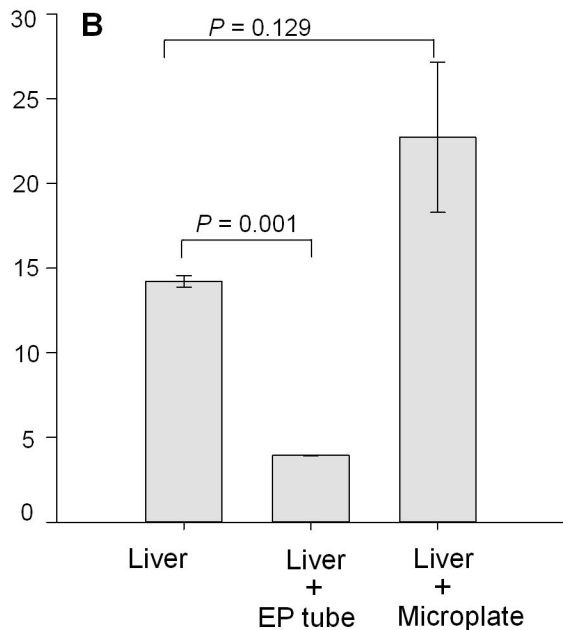

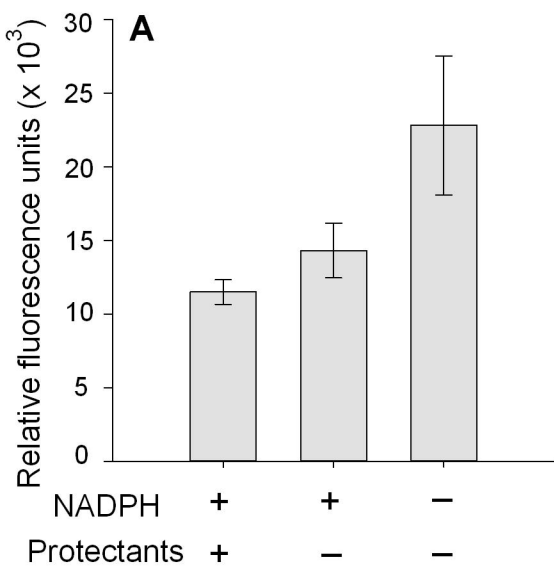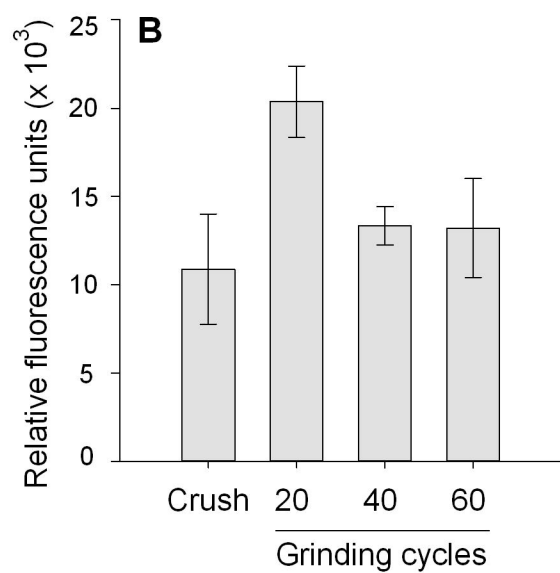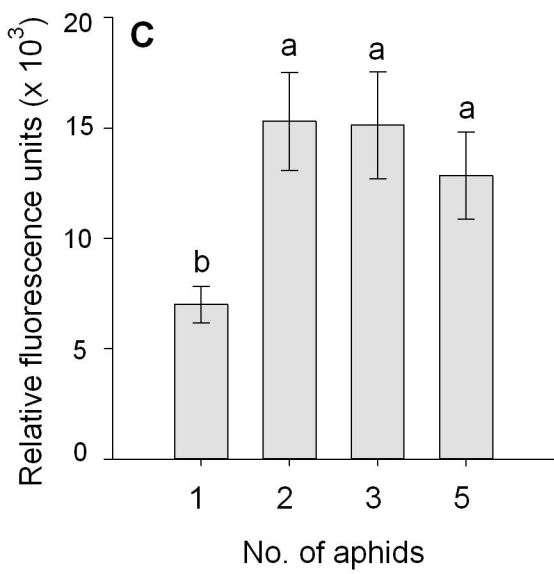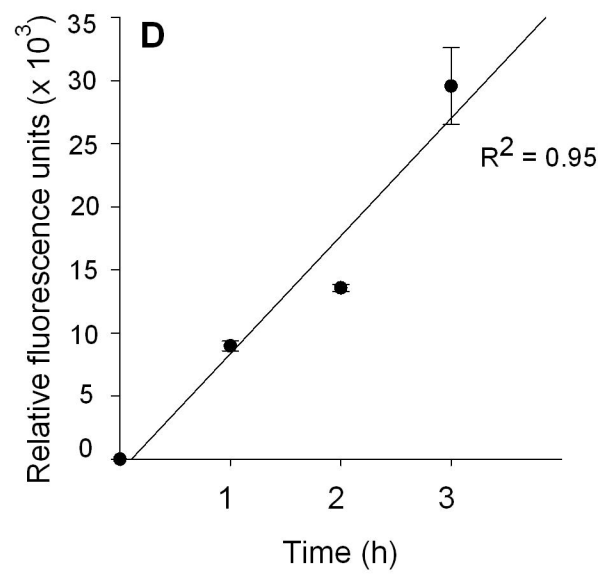

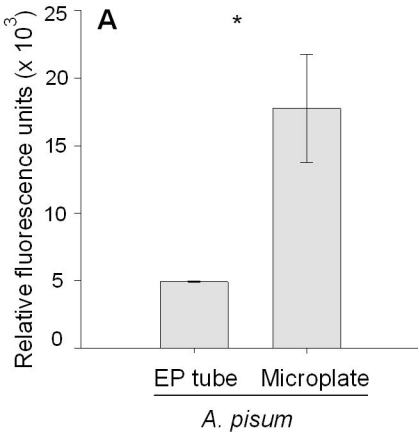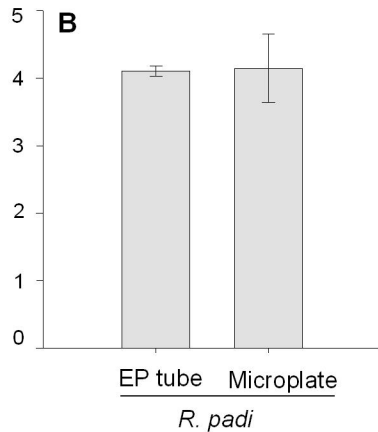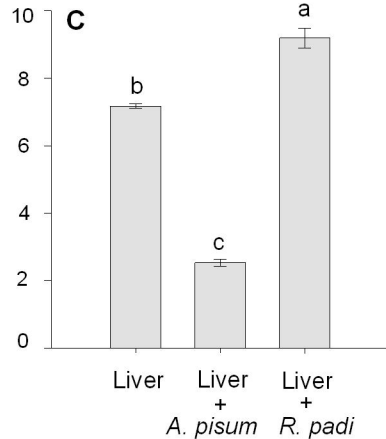

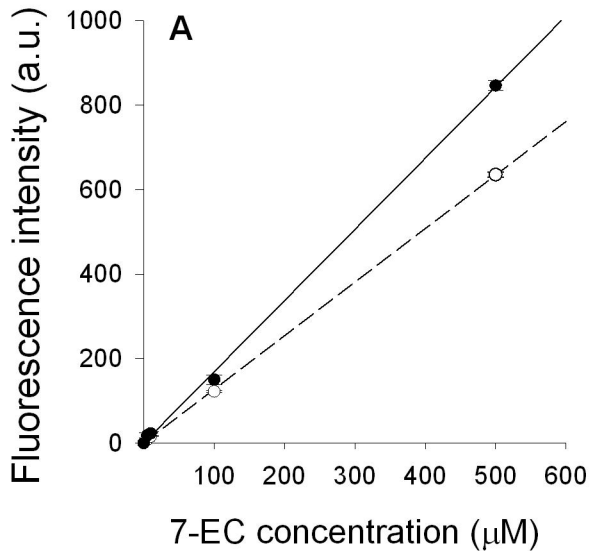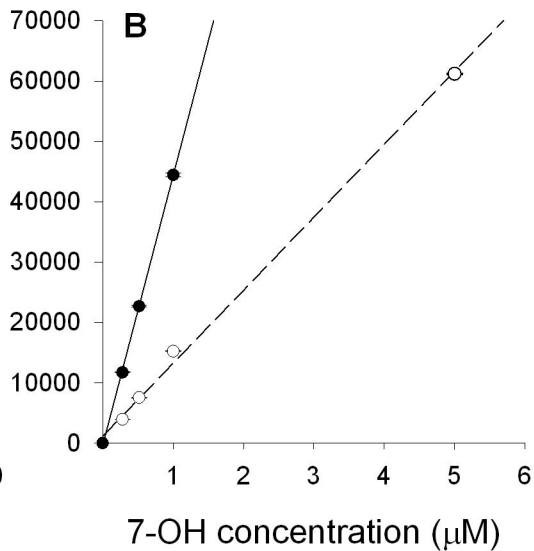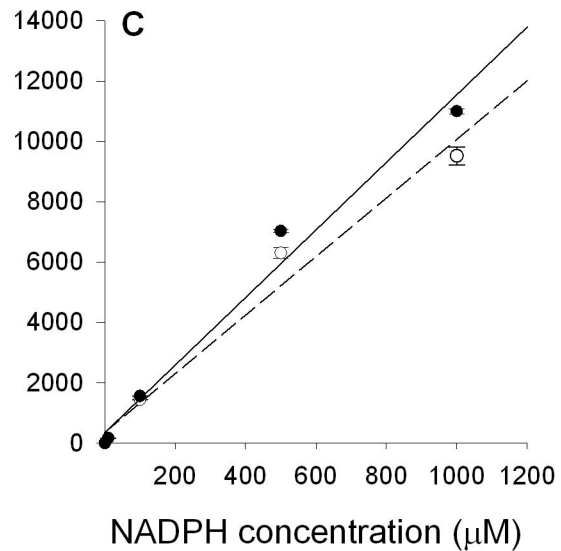

Source: https://www.biorxiv.org/content/10.1101/299545v1.full.pdf
